# Supplementary material
Source: MDPI journal article supplement (https://www.mdpi.com/2073-4395/13/5/1340)
Supplement: s1 [file s1 › Table S1.pdf]

**Table S1.** Concentrations of different fungicides.

| Fungicides     | Concentrations (µg/mL)                                    |
|----------------|-----------------------------------------------------------|
| picoxystrobin  | 0, 0.125, 0.25, 0.5, 1, 2, 4                              |
| azoxystrobin   | 0, 0.03125, 0.0625, 0.125, 0.25, 0.5, 1                   |
| pyraclostrobin | 0, 0.0039063, 0.0078125, 0.015625, 0.03125, 0.0625, 0.125 |
| difenoconazole | 0, 0.015625, 0.0625, 0.25, 1, 4, 16                       |
| carbendazim    | 0, 0.02, 0.04, 0.06, 0.08, 0.1, 0.2                       |
| phenamacril    | 0, 0.125, 0.25, 0.5, 1, 2, 4                              |
