# Supplementary material
Source: MDPI journal article supplement (https://www.mdpi.com/2073-4395/13/5/1340)
Supplement: s1 [file s1 › Table S2.pdf]

**Table S2.** Sequence obtained from GenBank of the *Neopestalotiopsis* isolates that used in the phylogenetic study.

| Strain | GenBank accession numbers |          |          |
|--------|---------------------------|----------|----------|
|        | ITS                       | TUB      | TEF1     |
| ZJJ5   | OQ316640                  | OQ325328 | OQ325332 |
| ZJJ8   | OQ316641                  | OQ325329 | OQ325333 |
| ZJJ10  | OQ316642                  | OQ325330 | OQ325334 |
| ZJJ17  | OQ316643                  | OQ325331 | OQ325335 |
| ZJJYK  | OK655673                  | OK644284 | OL322106 |
