# Supplementary material
Source: MDPI journal article supplement (https://www.mdpi.com/2073-4395/13/5/1340)
Supplement: s1 [file s1 › Table S3.pdf]

**Table S3.** Resistance factor and resistance stability of picoxystrobin-resistant mutants of *N. clavispora*.

| Strains | Phenotypes <sup>a</sup> | EC <sub>50</sub> (μg/mL) |                   |                   | Resistance factor <sup>b</sup> |      |      |
|---------|-------------------------|--------------------------|-------------------|-------------------|--------------------------------|------|------|
|         |                         | 1th <sup>c</sup>         | 10th <sup>d</sup> | 15th <sup>e</sup> | 1th                            | 10th | 15th |
| ZJJ5    | picoxystrobin-sensitive | 0.015                    | 0.025             | 0.021             |                                |      |      |
| ZJJ5-K2 | picoxystrobin-resistant | 0.877                    | 0.315             | 0.228             | 57                             | 13   | 11   |
| ZJJ5-K3 | picoxystrobin-resistant | 17.78                    | 3.22              | 2.31              | 1162                           | 129  | 112  |
| ZJJ5-K5 | picoxystrobin-resistant | 9.04                     | 0.99              | 0.85              | 591                            | 40   | 41   |

<sup>a</sup> Resistant mutants were obtained by field strains amended with fungicide in PDA plate and UV treatment.

<sup>b</sup> Resistance factor (RF): the ratio of EC<sub>50</sub> for the picoxystrobin-resistant mutants to that of its wild-type progenitor.

<sup>c</sup> The picoxystrobin-resistant mutants were transferred one time on fungicide-free PDA plates.

<sup>d</sup> The picoxystrobin-resistant mutants were transferred ten times on fungicide-free PDA plates.

<sup>e</sup> The picoxystrobin-resistant mutants were transferred fifteen times on fungicide-free PDA plates.
